1 Title:

2 Phylogenetic incongruence and the origins of cardenolide-resistant forms of Na<sup>+</sup>,K<sup>+</sup>-

3 ATPase in North American *Danaus* butterflies

4

5 Authors:

6 Matthew L. Aardema<sup>1,2</sup>, Peter Andolfatto<sup>1,3</sup>

7

8 <sup>1</sup>Department of Ecology and Evolutionary Biology, Princeton University, Princeton,

9 NJ, 08544, USA

10 <sup>2</sup> Current Address: American Museum of Natural History, New York, NY, 10024, USA

11 <sup>3</sup> Lewis-Sigler Institute for Integrative Genomics, Princeton University, Princeton, NJ,

12 08544, USA

13

14 Correspondence: Matthew L. Aardema

15 E-mail: [maardema@amnh.org](mailto:maardema@amnh.org)

16 **Abstract**

17           Rapid species radiations can obscure phylogenetic relationships between  
18 even distantly related species and lead to incorrect evolutionary inferences. For this  
19 reason, we examined evolutionary relationships among the three North American  
20 milkweed butterflies, *Danaus plexippus*, *D. gilippus* and *D. eresimus* using >400  
21 orthologous gene sequences assembled from transcriptome data. Contrary to  
22 previous phylogenetic assessments, our results indicate that *D. plexippus* and *D.*  
23 *eresimus* are the sister taxa among these species. This result explains many  
24 previously noted phylogenetic incongruences such as an amino acid substitution in  
25 the sodium-potassium pump (Na<sup>+</sup>,K<sup>+</sup>-ATPase) of *D. eresimus* and *D. plexippus*, which  
26 increases resistance to the toxins found in these butterflies' host plants. In  
27 accordance with a rapid radiation of *Danaus* butterflies, we also find evidence that  
28 both incomplete lineage sorting and post-speciation genetic exchange have  
29 contributed significantly to the evolutionary histories of these species. Furthermore,  
30 our findings suggest that *D. plexippus* is highly derived both morphologically and  
31 behaviorally.

32

33 **Key Words:** *Danaus*, Danaidae, milkweed butterfly, incomplete lineage sorting,  
34 genetic introgression, Na<sup>+</sup>,K<sup>+</sup>-ATPase

## 35 **Introduction**

36       Plants in the genus *Asclepias* (milkweed) often produce a class of toxic,  
37 secondary metabolites called cardenolides, which provide defense against herbivory  
38 (Dobler et al. 2011; Agrawal et al. 2012). Despite these protective chemicals, many  
39 insect species have evolved the ability to feed on these plants. The phylogenetically  
40 broad insect herbivore community that specializes on *Asclepias* has proved to be a  
41 particularly good system for studying convergent evolution (Dobler et al. 2012;  
42 Zhen et al. 2012; Petschenka et al. 2013). Studies of convergence in these insects  
43 have improved our understanding of the underlying genetic architecture behind  
44 adaptive traits and given insights into the extent of constraint on genetic change  
45 (Stern 2013; Dobler et al. 2015).

46       As larvae, butterflies of the genus *Danaus* feed almost exclusively on  
47 *Asclepias* host plants (Ackery and Vane-Wright 1984). Many species also sequester  
48 the plants' toxins for their own defense (Brower and Moffit 1974; Ackery and Vane-  
49 Wright 1984). Within the three species of North American *Danaus*, both *D. plexippus*  
50 (the monarch) and *D. eresimus* (the soldier) appear to be fixed for a functionally  
51 important amino acid substitution in the H1-H2 extracellular domain of Na<sup>+</sup>K<sup>+</sup>-  
52 ATPase (N122H; Fig. S1; Zhen et al. 2012). This substitution decreases larval  
53 sensitivity to cardenolides consumed while feeding on *Asclepias* host plants, and  
54 may also facilitate toxin sequestration (Dobler et al. 2012; Zhen et al. 2012;  
55 Petschenka et al. 2013). The N122H substitution has not been observed in the third  
56 North American *Danaus*, *D. gilippus* (the queen; Holzinger and Wink 1996; Aardema  
57 et al. 2012; Dobler et al. 2012; Zhen et al. 2012; Petschenka et al. 2013).

58            Interestingly, among these three species, *D. gilippus* and *D. eresimus* have  
59            historically been considered sister taxa, while *D. plexippus* has been classified as a  
60            more distant relative within the *Danaus* genus (Fig. S1; Ackery and Vane-Wright  
61            1984). This relationship was initially based on a large number of shared  
62            morphological traits and behavioral similarities between *D. gilippus* and *D. eresimus*,  
63            and it received further supported in analyses using sequence data from a small  
64            number of mitochondrial (mtDNA), ribosomal (rRNA) and nuclear genes (Lushai et  
65            al. 2003; Smith et al. 2005; Brower et al. 2010). However, in addition to the N122H  
66            substitution shared by *D. eresimus* and *D. plexippus*, other apparent phylogenetic  
67            incongruences have also been noted. For example, *D. eresimus* and *D. plexippus* are  
68            each reported to have 30 chromosomes, whereas *D. gilippus* appears to typically  
69            have 29 (Brown et al. 2004). Also, *D. eresimus* and *D. plexippus* have a shared Malic  
70            enzyme (ME) allozyme phenotype distinct from *D. gilippus* (Kitching 1985). A third  
71            example of apparent phylogenetic incongruence in these butterflies are the rear  
72            projections on the eighth sternal segment of *D. eresimus* and *D. plexippus* males,  
73            which *D. gilippus* males lack (Ackery and Vane-Wright 1984).

74            Given the inferred species phylogeny that places *D. gilippus* and *D. eresimus*  
75            as closer relatives within *Danaus*, the origins of the N122H substitution and other  
76            incongruences are unclear. In the case of N122H, it is possible that this mutation  
77            arose independently and in parallel within both *D. plexippus* and *D. eresimus*, and  
78            then subsequently fixed in each butterfly. Examples of this specific mutation  
79            evolving in disparate taxa have been reported previously, in other insect taxa,  
80            although not in other Lepidoptera outside the *Danaus* genus (Aardema et al. 2012;

81 Zhen et al. 2012). It is also possible that both the asparagine (N) and histidine (H)  
82 alleles were segregating in the common ancestor of these three species. If this is the  
83 case, then the histidine must have fixed independently in *D. plexippus* and *D.*  
84 *eresimus*, while being lost in *D. gilippus*. Such incomplete lineage sorting (ILS) is a  
85 common cause of phylogenetic incongruence (Degnan and Rosenberg 2006; 2009;  
86 Maddison and Knowles 2006). Adaptive introgression is a third hypothesis to  
87 explain fixation of the N122H allele in both *D. plexippus* and *D. eresimus*. Genetic  
88 exchange after splitting has become increasingly recognized as an important  
89 contributor to the evolutionary history of species (reviewed in Mallet et al. 2015),  
90 and it can often lead to phylogenetic incongruence (e.g. Bachtrog et al. 2006; Baack  
91 and Rieseberg 2007; Cui et al. 2013).

92 It is also possible that while the many morphological and behavioral  
93 similarities of *D. eresimus* and *D. gilippus* suggest they are more closely related, our  
94 understanding of the phylogenetic relationships of North American *Danaus* may  
95 benefit from a fresh examination. For this reason, the first goal of this study was to  
96 re-evaluate species relationships among these butterflies using a much larger set of  
97 genetic sequences than has previously been employed. We also compared the extent  
98 to which ILS and genetic introgression may have contributed to phylogenetic  
99 incongruences between these species. Both ILS and genetic introgression have  
100 previously been proposed to explain observed morphological and genetic  
101 incongruences in the *Danaus* genus (Lushai et al. 2003; Smith et al. 2005), but to  
102 date neither hypothesis has been examined explicitly.

103 Our results indicate that in contrast to previous phylogenetic analyses, *D.*  
104 *eresimus* and *D. plexippus* are the sister taxa among North American *Danaus*  
105 butterflies. This suggests that the N122H mutation in both species can be explained  
106 by an origin in their shared, common ancestor. However, we also find that levels of  
107 genetic incongruence in these species are high, and may result from both ILS and  
108 post-splitting genetic exchange. In addition to the origins of the N122H mutation in  
109 *Danaus*, the findings of this study indicate that *D. plexippus* is highly derived  
110 morphologically and behaviorally, relative to other *Danaus* species.

111

## 112 **Materials and Methods**

### 113 *Data preparation and location of orthologous sequences*

114 To examine phylogenetic incongruences and the origins of the N122H  
115 substitution within *Danaus*, we took advantage of previously produced RNAseq data  
116 for the three *Danaus* species present in North America and a fourth milkweed  
117 butterfly outgroup, *Lycoreia halia* (Zhen et al. 2012). Using just three focal species  
118 allows us to compare a major topology to only two possible minor topologies in a  
119 series of four-taxon trees, and assess whether these minor topologies occur at similar  
120 or different frequencies to one another. Such an assessment is a common way to  
121 investigate the origins of phylogenetic incongruence (e.g. Green et al. 2010; Eriksson  
122 and Manica 2012).

123

### 124 *Reference-mapped alignments*

125 Raw RNAseq reads from each of the four species were trimmed for quality  
126 (Phred QV  $\geq$  20) and contiguous length ( $\geq$  30 nucleotides). We first mapped the  
127 trimmed reads from each sample to *D. plexippus* reference coding sequences (CDS;  
128 <http://monarchbase.umassmed.edu/resource.html>) using Stampy (v. 1.0.17; Lunter  
129 and Goodson 2011) with default parameters except substitution rate, which we set  
130 to 0.01. We used SAMtools (v. 0.1.4) to convert the resulting SAM formatted files to  
131 BAM formatted files while filtering for mapping quality (MAPQ > 20, Li et al. 2009).  
132 The MarkDuplicates utility in Picard tools (v. 1.77;  
133 <http://broadinstitute.github.io/picard/>) was used to remove PCR duplicates. We  
134 used the HaplotypeCaller utility in GATK (v. 3.3; McKenna et al. 2010) to call  
135 variants, and then filtered all sites for a minimum read depth of 30. All sequences  
136 were checked by eye to ensure indels were in frame with relation to the reference.

137

### 138 *De novo-assembled alignments*

139 For a second set of sequence alignments, we produced independent *de novo*  
140 transcriptome assemblies for each species using the programs Velvet (v. 1.2.10) and  
141 Oases (v. 0.2.08) with a kmer length of 31 and a minimum read depth of 10 (Zerbino  
142 and Birney 2008; Schulz et al. 2012). In cases where multiple isoforms were  
143 assembled, we retained only the longest one. We located mtDNA regions by blasting  
144 each of the four species' transcripts against the *D. plexippus* mitochondrial genome  
145 (Genbank accession number KC836923; 'blastn'; Altschul et al. 1990). This was done  
146 for comparison to previously published results (Lushai et al. 2003; Smith et al. 2005;  
147 Brower et al. 2010). To locate orthologous nuclear sequences from our assembled

148 transcriptomes, the four transcript sets were compared to amino acid sequences of  
149 predicted proteins for *D. plexippus* (Dp\_geneset\_OGS2\_pep.fasta,  
150 <http://monarchbase.umassmed.edu/resource.html>), using Blast with a translated  
151 nucleotide query ('blastx') and a minimum e value of 1e-50. We compared our  
152 transcripts to amino acid sequences to improve likely ortholog recognition in the  
153 outgroup, *L. halia*. Only Blast hits that were at least 100 nucleotides long were  
154 retained for subsequent ortholog comparison between the four species. This was  
155 done to reduce regions that had limited phylogenetic information in our dataset, as  
156 well as improve the accuracy of our alignments (Talavera and Castresana 2007). For  
157 regions where any species had more than one transcript matching the *D. plexippus*  
158 reference protein sequence, we discarded this region for all species to avoid  
159 potential gene duplicates. Generally, a low level of polymorphism within a sample  
160 does not affect contig assembly in Velvet, and in these cases only a single allele is  
161 retained (Zerbino and Birney 2008). However, it is possible that highly polymorphic  
162 regions will assemble into more than one distinct transcript. In our pipeline, such  
163 regions would resemble gene duplicates and subsequently be removed.

164 We aligned orthologous regions based on amino acid similarity with MUSCLE  
165 (Edgar 2004) as implemented in SeaView (v. 4.5.4; Gouy et al. 2010). We then  
166 checked each sequence by eye and manually trimmed them to the length of the  
167 shortest region observed among the four species. As we are examining the  
168 relationship between three focal species and an outgroup, a missing species for a  
169 genetic region would have limited utility for phylogenetic inferences. We made no  
170 effort to identify specific genes within these datasets, with the exception of Na<sup>+</sup>,K<sup>+</sup>-



171 ATPase which we located in our *de novo* assemblies for each species using Blast (see  
172 above).

173

174 *Species trees*

175 We first concatenated all aligned mtDNA regions into a single dataset (i.e. no  
176 partitioning between regions). With jModelTest 2 (v. 2.1.7, Guindon and Gascuel  
177 2003; Darriba et al. 2012), we determined that a the generalized time reversible  
178 model (GTR; Tavaré 1986), with a gamma distribution of rate heterogeneity best fit  
179 this data based on AIC score (i.e. GTR +  $\Gamma$  model). We also concatenated all loci into  
180 single alignments (i.e. no partitioning between genes) independently for both  
181 nuclear gene datasets (reference-mapped and *de novo*-assembled). As above, we  
182 used jModelTest 2 to determine the best-fitting mutation model. For both genomic  
183 datasets, the best fit was GTR model with a proportion of invariable sites and a  
184 gamma distribution of rate heterogeneity (i.e. GTR + I +  $\Gamma$  model). Finally, we  
185 examined the topology of Na<sup>+</sup>,K<sup>+</sup>-ATPase using our *de novo* assemblies of this gene  
186 for each species. In this case the GTR +  $\Gamma$  model best fit the data.

187 For all datasets, we independently produced maximum likelihood  
188 phylogenies in RAxML (v. 8.1.7, Stamatakis 2014) with 100 bootstrap replicates for  
189 each of the three possible topologies among the *Danaus* species. The site log  
190 likelihoods from RAxML were used to perform the approximately unbiased (AU)  
191 test implemented in CONSEL 0.2 (Shimodaira and Hasegawa 2001). Two trees were  
192 statistically different from one another if  $p \leq 0.05$ .

193

194 *Discordance among nuclear gene trees*

195       To quantify the extent of phylogenetic discordance among our nuclear genes,  
196 we employed Bayesian concordance analysis (BCA), as implemented in BUCKy (v.  
197 1.4.3, Larget et al. 2010), to determine what proportion of genes concur with the  
198 primary species tree, and what proportions support the two alternative  
199 phylogenetic relationships (Ané et al. 2007). While BUCKy can identify significant  
200 levels of gene-tree discordance, it does not differentiate between ILS and  
201 hybridization to explain this discordance (Larget et al. 2010).

202       To carry out the BCA, we first produced individual trees for each gene in the  
203 dataset of *de novo*-assembled transcripts using MrBayes (v. 3.2.2, Ronquist and  
204 Huelsenbeck 2003), with two independent runs of  $10^7$  generations and a “burn in”  
205 period of  $10^5$  generations. Rather than *a priori* selecting a mutation model for each  
206 gene, we used the reversible-jump Markov chain Monte Carlo approach as described  
207 by Huelsenbeck and colleagues to examine the parameter space for each locus and  
208 find the best set of parameters for that particular dataset (Huelsenbeck et al. 2004).

209       We combined each of the two independent MrBayes runs for each gene using  
210 the `mbsum` command in BUCKy (v. 1.4.3, Larget et al. 2010). With the combined  
211 files, we examined the extent of discordance as measured by the sample-wide  
212 concordance factor (CF). This measure indicates the proportion of gene trees that  
213 support a particular species tree. The data was analyzed using an  $\alpha$  prior of 1.  $\alpha$  is an  
214 *a priori* discordance parameter that indicates the expected level of discordance  
215 among the different genes being analyzed (ranging from 0 to  $\infty$ ; Larget et al. 2010).  
216 If there is no expected discordant topologies among gene trees, then  $\alpha=0$ , whereas

217  $\alpha=\infty$  indicates that all gene trees are expected to have independent topologies. In  
218 our analysis, other values of  $\alpha$  (0.1 & 10) did not greatly alter inferred levels of  
219 incongruence (SI Table 3).

220

### 221 *Differentiating between incomplete lineage sorting and genetic introgression*

222 While BUCKy analysis reveals the extent of nuclear discordance among taxa,  
223 it does not indicate whether observed discordance is more likely to be due to ILS or  
224 genetic introgression after species splitting (although these are not mutually  
225 exclusive). To examine these two hypotheses we employed the ABBA/BABA test to  
226 calculate Patterson's D statistic for our dataset (Green et al. 2010). This statistic uses  
227 comparisons between three focal samples and an outgroup to determine whether  
228 phylogenetically-informative sites are in agreement with the primary phylogeny  
229 (AABB sites), or else support one of the two possible alternative relationships  
230 (ABBA or BABA, respectively). If incomplete lineage sorting is the primary  
231 contributor to observed phylogenetic incongruence, then ABBA and BABA sites  
232 should be present in approximately equal frequencies (D statistic  $\approx 0$ ). However,  
233 genetic exchange that occurs after splitting may result in an excess of either ABBA  
234 or BABA sites (D statistic  $\neq 0$ ). Structure in the ancestral population could also  
235 produce an asymmetry in ABBA/BABA sites, whereas post-splitting, symmetrical  
236 genetic exchange could produce equal frequencies of sites (Durand et al. 2011).

237 The ABBA/BABA test was performed with all informative sites, 4-fold  
238 synonymous sites and 0-fold replacement sites from our 478 *de novo*-assembled  
239 gene set. The standard deviation of D was determined by block jackknife sampling

240 (Kunsch 1989) with a block size of 40 genes, giving us 12 independent block  
241 estimates of  $D$ . 95% confidence intervals based on this jackknifed dataset were used  
242 to assess if  $D$  differed significantly from 0.

243

#### 244 *Genetic diversity and divergence times*

245 ILS is most likely to be observed when multiple speciation events occur in  
246 rapid succession. Therefore, we wanted to estimate approximate splitting times for  
247 these species. However, changes in the effective population size of a species ( $N_e$ )  
248 over time can influence divergence estimates and patterns of evolution  
249 (Charlesworth 2009). Therefore, we examined relative differences in contemporary  
250  $N_e$  for each species by calculating 4-fold synonymous genetic diversity ( $\pi_{4f}$ , Nei and  
251 Li 1979) within each of the four individual, wild-caught samples. To do this, we first  
252 mapped our trimmed reads to the species specific, *de novo*-assembled  
253 transcriptome for each of the four butterflies. We then used the HaplotypeCaller  
254 utility in the program GATK to identify genetic variants (McKenna et al. 2010). After  
255 this, sites with a read depth  $<30$  were filtered out of the dataset. Likely coding  
256 sequences were determined by independently comparing each of the four species' *de*  
257 *novo* assembled transcriptomes to the set of *D. plexippus* predicted proteins  
258 (Dp\_geneset\_OGS2\_pep.fasta, <http://monarchbase.umassmed.edu/resource.html>),  
259 using Blast with a translated nucleotide query ('blastx'; Altschul et al. 1990) and a  
260 minimum e value of  $1e-50$ .

261 Using a custom Perl script, we calculated mean genetic diversity per gene for  
262 all 4-fold synonymous sites ( $\pi_{4f}$ ) using the formula:  $(n/n-1) 2p(1-p)$ , where  $n$  is the

263 number of chromosomes in the sample (here,  $n = 2$ ) and  $p$  and  $(1-p)$  are the  
264 frequencies of alleles observed at a given site (here, either 1 & 0 [homozygous sites]  
265 or 0.5 & 0.5 [heterozygous site]). For each species, mean  $\pi_{4f}$  across all genes and  
266 95% confidence intervals were estimated by bootstrap sampling each gene set  
267 1,000 times with replacement, weighted by the number of 4-fold synonymous sites  
268 observed in each gene.

269 Species splitting times ( $t$ ) can be roughly calculated using the formula  $t = dS -$   
270  $\pi/2\mu$ , where  $dS$  is an estimate of the average number of synonymous nucleotide  
271 differences per synonymous site observed between two species (Nei 1987),  $\pi$  is a  
272 measure of intraspecific diversity, and  $\mu$  is an estimate of the mutation rate (Hudson  
273 et al. 1987; Bachtrog et al. 2006). For each species pair we estimated  $dS$  for all  
274 synonymous sites with the method of Nei and Gojobori (1986) as implemented in  
275 PAML (v. 4.8; Yang 2007). For our estimate of  $\pi$ , we used the larger of the species'  
276  $\pi_{4f}$  estimates from each species pair (Table S4, following Bachtrog et al. 2006). No  
277 estimates of a mutation rate for *Danaus* butterflies have been made, so we used a  
278 recent, experimentally determined per generation estimate from *Heliconius*  
279 *melpomene* for our calculations ( $2.9 \times 10^{-9}$  per site, Keightley et al. 2015). Both  
280 *Danaus* and *Heliconius* species are in the Nymphalidae family of butterflies. This per  
281 generation mutation estimate was converted to a per year estimate ( $\mu = 1.45 \times 10^{-8}$ ),  
282 conditioned on five generations per year (Malcolm et al. 1987).

283 We additionally employed a Bayesian method to examine approximate  
284 species' splitting times. As there are no known fossils that would allow us to  
285 independently calibrate any of the nodes in our phylogeny, we employed a rate-

286 based estimate of evolution at neutral sites following methods described by Obbard  
287 and colleagues (Obbard et al. 2012). For evaluation of neutral evolution, we utilized  
288 all 4-fold synonymous sites from the concatenated dataset of our *de novo*  
289 assemblies. While mutations at these sites may not be entirely neutral due to  
290 processes such as codon usage bias (Hershberg and Petrov 2008) and other types of  
291 selection (Lawrie et al. 2013), they are the best available option in this dataset.

292 Because we concatenated all 4-fold synonymous sites from each gene into a  
293 single dataset, we did not take into account variation in evolution rates between  
294 genes. Rather, we used the estimated 95% confidence intervals of the mutation rate  
295 given for *H. melpomene* to produce a lognormal distribution of rate variation around  
296 the mean for the complete dataset ( $6.5 \times 10^{-9}$  -  $2.8 \times 10^{-8}$  changes per year, again  
297 conditioned on five generations per year [Malcolm et al. 1987]). This allowed us to  
298 partially capture potential variation in rates among branches and may reduce  
299 overestimating the length of shorter branches (Schwartz and Mueller 2010).

300 We ran two MCMC chains of  $10^8$  iterations in the program BEAST (v. 1.8.1,  
301 Drummond and Rambaut 2007), with a log-normal relaxed molecular clock. Our  
302 substitution model was that of Hasegawa, Kishino and Yano (HKY, Hasegawa et al.  
303 1985), with a proportion of invariant sites and a gamma distribution of rate  
304 heterogeneity. We used a starting tree that matched the one found in our previous  
305 analyses based on nuclear genes (Fig. 1B-D), with a birth-death process of lineage  
306 birth as our tree prior (Gernhard 2008). Our “burn in” period was the initial 10% of  
307 states, and parameters were logged every 1,000 iterations. LogCombiner was used  
308 to merge our two separate runs (v. 1.8.1, included with the BEAST package). The log

309 files were checked using Tracer (v. 1.6; Rambaut et al. 2014) to ensure that an  
310 effective sampling size (ESS) greater than 200 were achieved for each parameter.  
311 Divergence times were estimated based on the 95% highest posterior density (HPD)  
312 interval.

313

## 314 **Results**

### 315 *Phylogenetic analysis*

316 Previous studies based on morphology and limited genetic data concluded  
317 that *D. eresimus* and *D. gilippus* are more closely related to one another than either is  
318 to *D. plexippus* (Ackery and Vane-Wright 1984; Lushai et al. 2003; Smith et al. 2005;  
319 Brower et al. 2010). Here, we re-evaluated this conclusion using multiple datasets of  
320 nuclear coding sequences, as well as mitochondrial data. The mitochondrial dataset  
321 totaled 6,648 aligned nucleotides. The reference-mapped, nuclear gene dataset  
322 contained 471 sequences, totaling 62,646 nucleotides, with an average sequence  
323 length of 133 nucleotides. The *de novo* assembled nuclear gene dataset contained  
324 478 sequences, totaling 220,188 nucleotides, with an average sequence length of  
325 461 nucleotides. All datasets were limited in the total number of genes analyzed as  
326 overlapping regions in each gene had to be assembled or mapped in all four species  
327 for inclusion.

328 In contrast to previous findings (Lushai et al. 2003; Smith et al. 2005, Brower  
329 et al. 2010), the best-supported mtDNA tree suggested that *D. plexippus* and *D.*  
330 *gilippus* are sister taxa and *D. eresimus* is basal to them (Fig. 1A). However, the log

331 likelihoods of the three possible mtDNA trees were not significantly different from  
332 each other (Table 1) and the bootstrap support for this relationship was only 65%.

333 For both the reference-mapped and *de novo*-assembled datasets, the best-  
334 supported topology placed *D. plexippus* and *D. eresimus* as sister taxa, with *D.*  
335 *gilippus* a more distant relative (Fig. 1B & C). For the reference-mapped dataset, a  
336 relationship that places *D. eresimus* and *D. plexippus* as sister taxa was significantly  
337 better than the other two possible topologies, whereas the relationship that places  
338 *D. plexippus* and *D. gilippus* as sister taxa was significantly better than the  
339 relationship that placed *D. gilippus* and *D. eresimus* as sister taxa (Table 1). For the  
340 *de novo* assembled dataset, the two alternative topologies were significantly worse  
341 fits than the primary tree, but they were not significantly different from each other  
342 (Table 1). There was 100% bootstrap support for the best tree topology in both  
343 analyses utilizing nuclear gene datasets.

344 The major difference between the trees produced by the two nuclear gene  
345 datasets (reference-mapped vs. *de novo*-assembled) is in the estimated branch  
346 lengths. Specifically, the branch lengths are substantially shorter in the reference-  
347 mapped dataset, especially for the ancestral *Danaus* branch and that of the  
348 outgroup, *L. halia*. We attribute these differences to a bias towards highly conserved  
349 genes in the reference-mapped dataset (Hornett and Wheat 2012). Such bias  
350 becomes more problematic as the evolutionary distance between two species  
351 increases. Additionally, for all four species, fewer reads mapped to the *D. plexippus*  
352 reference than to each species' independently assembled *de novo* transcriptome (SI  
353 Table 2), and the average sequence length was shorter. For these reasons, in



354 subsequent analyses, we exclusively used the data from our *de novo*-assembled  
355 dataset.

356 For Na<sup>+</sup>,K<sup>+</sup>-ATPase, the tree topology of this gene matched that observed  
357 from the full gene datasets (Fig. S2). However, species' branch lengths for this gene  
358 were much shorter than in the full datasets and bootstrap support for this  
359 relationship was only 58%. Furthermore, this topology was not statistically better  
360 than either of the alternative topologies (Table 1). These observations indicate that  
361 this gene is highly conserved between these butterflies.

362

### 363 *Phylogenetic discordance*

364 We carried out an analysis of gene tree discordance using BUCKy. This  
365 analysis revealed that the primary concordance tree was the same as that  
366 determined in the maximum-likelihood analyses using the reference-mapped and *de*  
367 *nov*o-assembled concatenated, genomic datasets (Fig. 1D). However, the BUCKy  
368 analysis also revealed significant discordance (>5%) between individual gene trees  
369 and the inferred species tree. A higher proportion of genes supported a closer  
370 relationship between *D. gilippus* and *D. plexippus*, than between *D. gilippus* and *D.*  
371 *eresimus*.

372 The full dataset contained 5,735 informative sites for the ABBA/BABA test.  
373 The percentages of sites supporting each of the three possible relationships are  
374 given in Fig. 2. The D statistic for this data was -0.118 (95% CIs: -0.121 to -0.114).  
375 There were 4,869 4-fold synonymous sites in our reduced dataset. For this data, the

376 D statistic was -0.134 (95% CIs: -0.138 to -0.130). There were 866 0-fold, non-  
377 synonymous sites. The D statistic was -0.025 (95% CIs: -0.031 to -0.019).

378 For all classes of sites, the D statistic was significantly less than 0, indicating  
379 that ABBA and BABA sites were not equally represented. In all cases, this was due to  
380 a larger number of BABA sites than ABBA sites. This suggests that a greater amount  
381 of gene flow has occurred between *D. plexippus* and *D. gilippus* after splitting than  
382 between *D. eresimus* and *D. gilippus*. It is also possible that this result is due to  
383 structure in the ancestral populations of these species (Green et al. 2010).

384

#### 385 *Genetic diversity and divergence time estimates*

386 As rapid radiation increases the likelihood that ILS will occur between  
387 species (Whitfield and Lockhart 2007), we wanted to calculate the divergence times  
388 of these *Danaus* butterflies. However, a species' effective population size ( $N_e$ ) can  
389 influence substitution rates (Ohta 1993; Woofit 2009), which could impact  
390 divergence time estimates. To assess the relative contemporary  $N_e$  of these species,  
391 we compared levels of 4-fold synonymous site diversity ( $\pi_{4f}$ , Table 2). Of the four  
392 species, *D. eresimus* had the lowest synonymous diversity ( $\pi_{4f} = 0.010$ , 95% CIs:  
393 0.009 - 0.011). The other three species all had similar levels of diversity (*L. halia*:  $\pi_{4f}$   
394 = 0.022, 95% CIs: 0.021 - 0.023; *D. gilippus*:  $\pi_{4f} = 0.021$ , 95% CIs: 0.018 - 0.023; *D.*  
395 *plexippus*:  $\pi_{4f} = 0.021$ , 95% CIs: 0.021 - 0.022). As the *D. eresimus* dataset had fewer  
396 assembled transcripts (Table S2), we subsampled our *D. plexippus* dataset 10,000  
397 times to calculate a mean and confidence intervals with the same number of genes  
398 as in the *D. eresimus* dataset. Our subsampled estimate of diversity for *D. plexippus*

399 was significantly different from that of *D. eresimus* ( $\pi_{4f} = 0.021$ , 95% CIs: 0.020 -  
400 0.022), indicating that the lower diversity level of *D. eresimus* is not likely due to the  
401 smaller number of genes represented in this dataset.

402 The similarities in genetic diversity levels exhibited in *D. plexippus* and *D.*  
403 *gilippus* suggest that they have comparable contemporary  $N_e$ , while the population  
404 from which the *D. eresimus* sample was collected likely has a relatively smaller  $N_e$ .  
405 Differences in  $N_e$  between these species could affect estimates of divergence times.  
406 Specifically, *D. eresimus* may have had a higher rate of evolution over time than the  
407 other three species. However, Tajima's relative rate test (Tajima 1993), using all  
408 sites from the concatenated *de novo* dataset suggests that *D. eresimus* has had a  
409 similar rate of evolution to *D. gilippus* ( $\chi^2 = 2.46$ ,  $p=0.074$ ), whereas the rate of  
410 evolution in *D. plexippus* was higher than both *D. gilippus* ( $\chi^2 = 31.11$ ,  $p<0.001$ ) and  
411 *D. eresimus* ( $\chi^2 = 20.25$ ,  $p<0.001$ ). Thus, we do not infer any evolutionary patterns in  
412 relation to contemporary  $N_e$  in these species.

413 The estimate of pairwise synonymous divergence ( $d_S$ ) between *D. gilippus*  
414 and *D. eresimus* was 0.369 (95% CIs: 0.348 – 0.390). Assuming five generations per  
415 year (Malcolm et al. 1987), we estimated that the splitting time for *D. gilippus* and *D.*  
416 *eresimus* was 11.7 million years ago (MYA), (95% CIs: 11.0 – 12.4 MYA). For *D.*  
417 *gilippus* and *D. plexippus*,  $d_S=0.312$  (95% CIs: 0.310 – 0.337), and the estimated  
418 splitting time was 10.4 MYA (95% CIs: 9.7 – 10.8 MYA). The difference between  
419 these two divergence time estimates involving *D. gilippus* may reflect the larger  
420 extent of post-splitting genetic exchange that we infer to have occurred between *D.*  
421 *gilippus* and *D. plexippus*. It may also reflect a greater number of fixed differences

422 driven by the relatively smaller  $N_e$  of *D. eresimus*. Synonymous divergence between  
423 *D. plexippus* and *D. eresimus* was 0.233 (95% CIs: 0.224 – 0.242), and our estimate of  
424 the splitting time between these species was 7.1 MYA (95% CIs: 6.8 – 7.4 MYA).

425 Bayesian estimates of divergence times using 4-fold synonymous sites and a  
426 log-normally distributed mutation rate suggested that *D. plexippus* and *D. eresimus*  
427 diverged 7.2 MYA (95% highest posterior density [HPD]: 6.9 – 7.5), whereas *D.*  
428 *gilippus* diverged from the common ancestor of *D. plexippus* and *D. eresimus* 11.0  
429 MYA (95% HPD: 10.7 – 11.4). These estimates of splitting time are nearly identical  
430 to our simple estimates, which were also based on synonymous divergence and a  
431 fixed mutation rate. The simple divergence time estimate for *D. plexippus* and *D.*  
432 *eresimus* based on observed synonymous divergence falls within the 95% HPD  
433 interval for the divergence time between these species in the Bayesian analysis. The  
434 HPD interval for the divergence time of *D. gilippus* and the *D. plexippus*/*D. eresimus*  
435 common ancestor is somewhat lower than the simple estimate for the split between  
436 *D. gilippus* and *D. eresimus*, but somewhat higher than the estimate for that between  
437 *D. gilippus* and *D. plexippus*. Overall, these divergence estimates suggest that the  
438 three species diverged relatively rapidly from one another (within 3 – 4 million  
439 years), which may have increased the likelihood that ILS occurred.

440 We explicitly examined the extent of ILS given our estimated divergence  
441 times by simulating the coalescent of 10,000 genes in *ms* (Hudson 2002). We used  
442 0.02 for our estimate of  $\theta$  ( $4N_e\mu$ ) and converted our estimated divergence times to  
443 units of  $4N_e$  generations (run command: `ms 3 10000 -t 0.02 -I 3 1 1 1 -ej 2.4 1 2 -ej`  
444 `3.6 2 3 -T`). From these simulations, we infer that ~8% of genetic regions will

445 exhibit an alternative topology to that of the true species relationship given the  
446 divergence times calculated here.

447

## 448 **Discussion**

449 Evolutionary relationships within the *Danaus* genus are a subject of  
450 uncertainty due to incongruences in both morphology and genetic sequences  
451 (Ackery and Vane-Wright 1984; Kitching 1985; Brown et al. 2004; Smith et al. 2005;  
452 Zhen et al. 2012). In contrast to previous studies (Ackery and Vane-Wright 1984;  
453 Lushai et al. 2003; Smith et al. 2005; Brower et al. 2010), the analyses described  
454 here indicate that *D. plexippus* and *D. eresimus* are the more closely related species,  
455 whereas *D. gilippus* is a more distant relative. While this relationship is well  
456 supported, we also observe significant phylogenetic discordance between these  
457 species. This may be attributed to several factors including incomplete lineage  
458 sorting (ILS) and post-speciation gene flow. Relative to the amount of evolutionary  
459 divergence that occurred after these three species split from their common  
460 ancestor, their speciation times are brief. This means that ILS is likely to explain  
461 some phylogenetic incongruence. Using coalescence simulations, we calculated that  
462 ~8% of gene regions will exhibit an alternative topology to that of the true species  
463 tree given our estimated splitting times. This is less than the ~18% of phylogenetic  
464 discordance detected. This observation, combined with the results of the  
465 ABBA/BABA test, suggests that genetic exchange after these species diverged also  
466 likely contributed to incongruences between these species. Similar explanations  
467 have been proposed to explain extensive phylogenetic discordance in many other

468 species groups (e.g. Moody and Rieseberg 2012; Cui et al. 2013; Liu et al 2015),  
469 including butterflies (Kozak et al. 2015).

470 In addition to amending current phylogenetic understanding of the *Danaus*  
471 genus, our results shed light on the origins of the N122H substitution in the H1-H2  
472 extracellular domain of Na<sup>+</sup>,K<sup>+</sup>-ATPase. As the gene tree topology for this region is  
473 concordant with the best-supported phylogeny from whole nuclear gene datasets  
474 (Fig. S2), the most parsimonious scenario to explain the N122H mutation in both *D.*  
475 *plexippus* and *D. eresimus* is an emergence in their shared common ancestor. If this is  
476 the case, it then either fixed before their split, or else fixed independently in each  
477 lineage (Fig. S3A). It is also possible that the N122H mutation arose in the common  
478 ancestor of all three *Danaus* species, and was subsequently lost in *D. gilippus* (Fig.  
479 S3B). We cannot confidently differentiate between this and the previous hypothesis  
480 with the data currently available.

481 If the N122H allele had a strong adaptive advantage when it arose, it most  
482 likely fixed rapidly. This would have resulted in a selective sweep, reducing genetic  
483 diversity in this gene (Maynard Smith and Haigh 1974). Interestingly, 4-fold  
484 synonymous diversity estimates for Na<sup>+</sup>,K<sup>+</sup>-ATPase in both *D. plexippus* and *D.*  
485 *eresimus* are slightly higher than genome-wide estimates (Table 2). This suggests  
486 that if a sweep occurred, it was not recent in either species' evolutionary history.

487 Estimated synonymous divergence (dS) between *D. plexippus* and *D. eresimus*  
488 for Na<sup>+</sup>,K<sup>+</sup>-ATPase is 0.15, whereas the genome-wide estimate is 0.23. This  
489 divergence estimate translates to a splitting time of ~5.4 MY for Na<sup>+</sup>,K<sup>+</sup>-ATPase,  
490 which is less than the estimated splitting time for these two species based on the full

491 gene dataset. This observation lends support to the third hypothesis that adaptive  
492 introgression from either *D. plexippus* or *D. eresimus* into the other species can  
493 explain the presence of the N122H mutation in both butterflies (Fig. S3C). However,  
494 had this occurred, we would predict that Na<sup>+</sup>K<sup>+</sup>-ATPase genetic diversity in one of  
495 these species would be low relative to other genetic regions. As noted previous, we  
496 actually observe relatively high levels of synonymous diversity in Na<sup>+</sup>K<sup>+</sup>-ATPase.  
497 Additionally, in the case of adaptive introgression, divergence in this gene between  
498 *D. plexippus* and *D. eresimus* should be low relative to other genes. While we do  
499 observe this (Fig. S2, Fig. S4), Na<sup>+</sup>K<sup>+</sup>-ATPase divergence is low overall among all the  
500 butterflies in this study. This suggests that the low level of Na<sup>+</sup>K<sup>+</sup>-ATPase divergence  
501 between *D. plexippus* and *D. eresimus* is not the result of introgression, but rather  
502 that this gene is highly conserved between these butterflies.

503 Another question this study raises is the origins of the extensive phenotypic  
504 divergence observed in *D. plexippus*. Divergent traits of *D. plexippus* include changes  
505 in wing size, color and mating strategy, as well as the establishment of long-distance  
506 migration (Ackery and Vane-Wright 1984). Changes in wing coloration may have  
507 arisen in response to selection for increased mimic resemblance with *Limenitis*  
508 *archippus* (the viceroy), as these two butterflies are Müllerian mimics of one another  
509 (Ritland and Brower 1991). Other behavioral and morphological shifts could have  
510 occurred in response to the evolution of migratory behavior in *D. plexippus* (Wells et  
511 al. 1993; Dockx 2007). It is interesting in this respect that recent work suggests all  
512 contemporary monarch populations (including non-migratory ones) originated  
513 from a North American migratory population (Brower et al. 2007; Zhan et al. 2014).

514 Changes in mating strategy, which could have arisen in connection with migratory  
515 behavior, may also have produced some morphological changes (Ackery and Vane-  
516 Wright 1984). The uniquely derived traits of *D. plexippus* have likely obscured  
517 phylogenetic relationships between North American *Danaus* species and lead to the  
518 different conclusions than the ones presented here. It is noteworthy in this regard  
519 that Tajima's relative rate test (based on all sites) suggests that *D. plexippus* has  
520 experienced a significantly higher rate of molecular evolution than the other two  
521 *Danaus* species (see Results).

522 It is also of interest that in most previous genetic analyses of *Danaus* species  
523 relationships, all *D. eresimus* samples and nearly all *D. gilippus* samples came from  
524 the Cayman Islands (Lushai et al. 2003; Smith et al. 2005; Brower et al. 2010). It is  
525 possible that these samples may have unique attributes (e.g. recent genetic  
526 exchange, reduced  $N_e$ , etc.), and are not typical of their species more broadly. While  
527 the samples in this study all came from continental North America, they may also  
528 not accurately capture the genetic diversity patterns of these widespread butterflies.  
529 More specifically, it is possible that either contemporary or ancestral population  
530 structure could be confounding some of our results. Population structure within  
531 species can generate genetic patterns that resemble those of hybridization between  
532 species (Green et al. 2010; Eriksson and Manica 2012). Very little population  
533 structure has been observed in *D. plexippus*, presumably due to their migratory  
534 behavior and overall high mobility (Eanes and Koehn 1978, Brower and Boyce 1991,  
535 Lyons et al. 2012). Less is known about population structure in *D. gilippus* or *D.*  
536 *eresimus*. However, while not migratory like *D. plexippus*, both are also considered to



537 be highly mobile (Smith et al. 2002). In future work, we hope to address interesting  
538 questions regarding gene flow and population structure within these butterflies  
539 throughout their geographic ranges. We also hope to look across the *Danaus* clade  
540 more broadly to assess levels of phylogenetic incongruence throughout this genus.

541

## 542 **Conclusions**

543 Common ancestry is the simplest explanation for the shared N122H mutation  
544 in the H1-H2 extracellular domain of Na<sup>+</sup>,K<sup>+</sup>-ATPase observed in *D. plexippus* and *D.*  
545 *eresimus*. However, earlier origins within *Danaus* or post-speciation genetic  
546 exchange are also possibilities. Relatively rapid divergence and historical  
547 introgression likely contributed to observed phylogenetic incongruences among  
548 these North American *Danaus* butterflies. As the majority of phylogenetic analyses  
549 for the milkweed butterflies (*Danainae*) have relied heavily on morphology and  
550 limited genetic data, this study highlights a potential need to reevaluate the  
551 relationships among milkweed butterflies more broadly. In particular, the extent of  
552 incomplete lineage sorting and genetic introgression in this clade should be  
553 assessed. Such examinations could potentially reveal more about the evolution of  
554 novel morphological and behavioral traits in these butterflies including *D. plexippus*.

555

## 556 **Acknowledgements**

557 V. Miró Pina and M. Schumer provided helpful comments on earlier versions of this  
558 work. A Briscoe kindly contributed the *D. gilippus*, *D. eresimus* and *L. halia* for the  
559 original study that produced the original data utilized here.

560

561

562 **Data Accessibility**

563 The data used for this study can be found at: [http://genomics-pubs.princeton.edu](http://genomics-pubs.princeton.edu/insect_genomics/data.shtml)  
564 [/insect\\_genomics/data.shtml](http://genomics-pubs.princeton.edu/insect_genomics/data.shtml)

565

566 **References**

- 567 Aardema, M. L., Y. Zhen and P. Andolfatto. 2012. The evolution of cardenolide-  
568 resistant forms of Na<sup>+</sup>,K<sup>+</sup>-ATPase in Danainae butterflies. *Mol. Ecol.* 21: 340-349.
- 569 Ackery, P. R. and R. I. Vane-Wright. 1984. Milkweed butterflies: their cladistics and  
570 biology. Cornell Univ. Press, Ithaca, NY.
- 571 Agrawal, A. A., G. Petschnka, R. A. Bingham, M. G. Weber and S. Rasmann. 2012. Toxic  
572 cardenolides: chemical ecology and coevolution of specialized plant-herbivore  
573 interactions. *New Phytol* 194:28-45.
- 574 Ané, C., B. Larget, D. A. Baum, S. D. Smith and A. Rokas. 2007. Bayesian estimation of  
575 concordance among gene trees. *Mol. Biol. Evol.* 24:412-426.
- 576 Altschul, S. F., W. Gish, W. Miller, E. W. Myers and D. J. Lipman. 1990. Basic local  
577 alignment search tool. *J. Mol. Biol.* 215:403-410.
- 578 Baack, E. J. and L. H. Rieseberg. 2007. A genomic view of introgression and hybrid  
579 speciation. *Curr. Opin. Genet. Dev.* 17:513-518.
- 580 Bachtrog, D., K. Thornton, A. Clark and P. Andolfatto. 2006. Extensive introgression  
581 of mitochondrial DNA relative to nuclear genes in the *Drosophila yakuba* species  
582 group. *Evolution* 60:292-302.

- 583 Brower, A. V. Z. and T. M. Boyce. 1991. Mitochondrial DNA variation in monarch  
584 butterflies. *Evolution* 45:1281-1286.
- 585 Brower, L. P. and C. M. Moffit. 1974. Palatability dynamics of cardenolides in the  
586 monarch butterfly. *Nature* 249:280-283.
- 587 Brower, L. P., K. S. Oberhauser, M. Boppré, A. V. Z. Brower and R. I. Vane-Wright.  
588 2007. Monarch sex: ancient rites, or recent wrongs? *Antenna* 31: 12–18.
- 589 Brower, A. V. Z., N. Wahlberg, J. R. Ogawa, M. Boppré, and R. I. Vane-Wright. 2010.  
590 Phylogenetic relationships among genera of danaine butterflies (Lepidoptera:  
591 Nymphalidae) as implied by morphology and DNA sequences. *Syst. Biodivers.*  
592 8:75-89.
- 593 Brown, K. S. Jr., B. von Schoultz and E. Suomalainen. 2004. Chromosome evolution in  
594 Neotropical Danainae and Ithomiinae (Lepidoptera). *Hereditas* 141:216-236.
- 595 Charlesworth, B. 2009. Effective population size and patterns of molecular evolution  
596 and variation. *Nat. Rev. Genet.* 10:195-205
- 597 Cui, R., M. Schumer, K. Kruesi, R. Walter, P. Andolfatto and G. G. Rosenthal. 2013.  
598 Phylogenomics reveals extensive reticulate evolution in *Xiphophorus* fishes.  
599 *Evolution* 67:2166-2179.
- 600 Darriba, D., G. L. Taboada, R. Doallo and D. Posada. 2012. jModelTest 2: more  
601 models, new heuristics and parallel computing. *Nat. Methods* 9:772.
- 602 Degnan, J. H. and N. A. Rosenberg. 2006. Discordance of species trees with their most  
603 likely gene trees. *PLoS Genet.* 2:e68.
- 604 Degnan, J. H. and N. A. Rosenberg. 2009. Gene tree discordance, phylogenetic  
605 inference and the multispecies coalescent. *Trends Ecol. Evol.* 24:332-340.

- 606 Dobler, S., G. Petschenka and H. C. Pankoke. 2011. Coping with toxic plant  
607 compounds - the insect's perspective on iridoid glycosides and cardenolides.  
608 *Phytochemistry* 72:1593-1604.
- 609 Dobler, S., S. Dalla, V. Wagschal and A. A. Agrawal. 2012. Community-wide  
610 convergent evolution in insect adaptation to toxic cardenolides by substitutions  
611 in the Na,K-ATPase. *Proc. Natl. Acad. Sci. USA* 109:13040-13045.
- 612 Dobler, S., G. Petschnka, V. Wagschal, L. Flacht. 2015. Convergent adaptive evolution  
613 - how insects master the challenge of cardiac glycoside-containing host plants.  
614 *Entomol. Exp. Appl.* 157:30-39.
- 615 Dockx, C. 2007. Directional and stabilizing selection on wing size and shape in  
616 migrant and resident monarch butterflies, *Danaus plexippus* (L.), in Cuba. *Biol. J.*  
617 *Linn. Soc.* 92:605-616.
- 618 Drummond, A. J. and A. Rambaut. 2007. BEAST: Bayesian evolutionary analysis by  
619 sampling trees. *BMC Evol. Biol.* 7:214.
- 620 Eanes, W.F. and R. K. Koehn. 1978. Analysis of genetic structure in the monarch  
621 butterfly, *Danaus plexippus* L. *Evolution* 32:784-797.
- 622 Edgar, R. C. 2004. MUSCLE: multiple sequence alignment with high accuracy and  
623 high throughput. *Nucleic Acids Res.* 32:1792-7197.
- 624 Eriksson, A. and A. Manica. 2012. Effect of population structure on the degree of  
625 polymorphism shared between modern human populations and ancient  
626 hominins. *Proc. Natl. Acad. Sci. USA* 109:13956-13960.
- 627 Gernhard, T. 2008. The conditioned reconstructed process. *J. Theor. Biol.* 253:769-  
628 778.

- 629 Gouy, M., S. Guindon and O. Gascuel. 2010. SeaView version 4: a multiplatform  
630 graphical user interface for sequence alignment and phylogenetic tree building.  
631 Mol. Biol. Evol. 27:221-224.
- 632 Green, R. E., J. Krause, A. W. Briggs, T. Maricic, U. Stenzel, M. Kircher, N. Patterson, H.  
633 Li, W. Zhai, M. H. Fritz, et al. 2010. A draft sequence of the Neanderthal genome.  
634 Science 328:710–722.
- 635 Guindon, S. and O. Gascuel. 2003. A simple, fast and accurate method to estimate  
636 large phylogenies by maximum-likelihood. Syst. Biol. 52:696-704.
- 637 Hasegawa, M., H. Kishino and T. Yano. 1985. Dating of the human-ape splitting by a  
638 molecular clock of mitochondrial DNA. J. Mol. Evol. 22:160-174.
- 639 Hershberg, R. and D. A. Petrov. 2008. Selection on codon bias. Annu. Rev. Genet.  
640 42:287-299.
- 641 Holzinger, F. and M. Wink. 1996. Mediation of cardiac glycoside insensitivity in the  
642 monarch butterfly (*Danaus plexippus*): role of an amino acid substitution in the  
643 ouabain binding site of Na<sup>+</sup>,K<sup>+</sup>-ATPase. J. Chem. Ecol. 22:1921-1937.
- 644 Hornett, E. A. and C. W. Wheat. 2012. Quantitative RNA-Seq analysis in non-model  
645 species: assessing transcriptome assemblies as a scaffold and the utility of  
646 evolutionary divergent genomic reference species. BMC Genomics 13:361.
- 647 Hudson, R. R. 2002. Generating samples under a Wright-Fisher neutral model of  
648 genetic variation. Bioinformatics 18: 337-338.
- 649 Hudson, R. R., M. Kreitman and M. Aguadé. 1987. A test of neutral molecular  
650 evolution based on nucleotide data. Genetics 116:153-159.

- 651 Huelsenbeck, J. P., B. Larget and M. E. Alfaro. 2004. Bayesian phylogenetic model  
652 selection using reversible jump Markov chain Monte Carlo. *Mol. Biol. Evol.*  
653 21:1123-1133.
- 654 Keightley, P. D., A. Pinharanda, R. W. Ness, F. Simpson, K. K. Dasmahapatra, J. Mallet,  
655 J. W. Davey and C. D. Jiggins. 2015. Estimation of the spontaneous mutation rate  
656 in *Heliconius melpomene*. *Mol. Biol. Evol.* 32:239-243.
- 657 Kozak, K. M., N. Wahlberg, A. Neild, K. K. Dasmahapatra, J. Mallet and C. D. Jiggins.  
658 2015. Multilocus species trees show the recent adaptive radiation of the mimetic  
659 *Heliconius* butterflies. *Syst. Bio.* 64:505-524.
- 660 Kunsch, H. 1989. The jackknife and the bootstrap for general stationary  
661 observations. *Ann. Stat.* 17:1217-1241.
- 662 Larget, B. R., S. K. Kotha, C. N. Dewey and C. Ané. 2010. BUCKy: Gene tree/species  
663 tree reconciliation with Bayesian concordance analysis. *Bioinformatics* 26:2910-  
664 2911.
- 665 Lawrie, D. S., P. W. Messer, R. Hershberg and D. A. Petrov. 2013. Strong purifying  
666 selection at synonymous sites in *D. melanogaster*. *PLoS Genet.* 9:e1003527.
- 667 Li, H., B. Handsaker, A. Wysoker, T. Fennell, J. Ruan, N. Homer, G. Marth, G. Abecasis,  
668 R. Durbin and 1000 Genome Project Data Processing Subgroup. 2009. The  
669 Sequence alignment/map (SAM) format and SAMtools. *Bioinformatics* 25:2078-  
670 2079
- 671 Liu, K. J., E. Steinberg, A. Yozzo, Y. Song, M. H. Kohn and L. Nakhleh. 2015.  
672 Interspecific introgressive origin of genomic diversity in the house mouse. *Proc.*  
673 *Natl. Acad. Sci. USA* 112:196-201.

- 674 Lunter, G. and M. Goodson. 2011. Stampy: a statistical algorithm for sensitive and  
675 fast mapping of Illumina sequence reads. *Genome Res.* 21:936-939.
- 676 Lushai, G., D. A. S. Smith, D. Goulson, J. A. Allen and N. Maclean. 2003. Mitochondrial  
677 DNA clocks and the phylogeny of *Danaus* butterflies. *Insect Sci. Appl.* 23:309-315.
- 678 Lyons, J. I., A. A. Pierce, S. M. Barribeau, E. D. Sternberg, A. J. Mongue and J. C. de  
679 Roode. 2012. Lack of genetic differentiation between monarch butterflies with  
680 divergent migration destinations. *Mol. Ecol.* 21:3433-3444.
- 681 Maddison, W. P. and L. L. Knowles. 2006. Inferring phylogeny despite incomplete  
682 lineage sorting. *Syst. Biol.* 55:21-30.
- 683 Malcolm, S. B., B. J. Cockrell and L. P. Brower. 1987. Monarch butterfly voltinism:  
684 effects of temperature constraints at different latitudes. *Oikos* 49:77-82.
- 685 Mallet, J., N. Besansky and M. W. Hahn. 2015. How reticulated are species? *Bioessays*  
686 37: DOI 10.1002/bies.201500149.
- 687 Maynard Smith, J. and J. Haigh. 1974. The hitchhiking effect of a favourable gene.  
688 *Genet. Res.* 23:23-35.
- 689 McKenna, A., M. Hanna, E. Banks, A. Sivachenko, K. Cibulskis, A. Kernytsky, K.  
690 Garimella, D. Altshuler, S. Gabriel, M. Daly and M. A. DePristo. 2010. The Genome  
691 Analysis Toolkit: a MapReduce framework for analyzing next-generation DNA  
692 sequencing data. *Genome Res.* 20:1297-1303.
- 693 Moody, M. L. and L. H. Rieseberg. 2012. Sorting through the chaff, nDNA gene trees  
694 for phylogenetic inference and hybrid identification of annual sunflowers  
695 (*Helianthus* sect. *Helianthus*). *Mol. Phylogenet. Evol.* 64:145-155.
- 696 Nei, M. 1987. *Molecular evolutionary genetics*. New York: Columbia Univ. Press.

697 Nei, M. and W-H. Li. 1979. Mathematical model for studying genetic variation in  
698 terms of restriction endonucleases, Proc. Natl. Acad. Sci. USA 76:5269-5273.

699 Nei, M. and T. Gojobori. 1986. Simple methods for estimating the numbers of  
700 synonymous and nonsynonymous nucleotide substitutions. Mol. Biol. Evol. 3:418-  
701 426.

702 Obbard, D. J., J. Maclennan, K-W. Kim, A. Rambaut, P. M. O'Grady and F. M. Jiggins.  
703 2012. Estimating divergence dates and substitution rates in the *Drosophila*  
704 phylogeny. Mol. Biol. Evol. 29:3459-3473.

705 Ohta, T. 1993. Amino acid substitution at the Adh locus of *Drosophila* is facilitated  
706 by small population size. Proc. Natl. Acad. Sci. USA. 90:4548-51.

707 Petschenka, G., S. Fandrich, N. Sander, V. Wagschal, M. Boppré and S. Dobler. 2013.  
708 Stepwise evolution of resistance to toxic cardenolides via genetic substitutions in  
709 the Na<sup>+</sup>/K<sup>+</sup>-ATPase of milkweed butterflies (Lepidoptera: Danaini). Evolution  
710 67:2753-2761.

711 Rambaut, A., M. A. Suchard, D. Xie and A. J. Drummond. 2014. Tracer v1.6, Available  
712 from <http://beast.bio.ed.ac.uk/Tracer>.

713 Ritland, D. B. and L. P. Brower. 1991. The viceroy butterfly is not a batesian mimic.  
714 Nature 350:497-498.

715 Ronquist, F., and J. P. Huelsenbeck. 2003. MrBayes 3: Bayesian phylogenetic  
716 inference under mixed models. Bioinformatics 19:1572-1574.

717 Schulz, M. H., D. R. Zerbino, M. Vingron and E. Birney. 2012. Oases: Robust de novo  
718 RNA-seq assembly across the dynamic range of expression levels. Bioinformatics  
719 28:1086-1092.



- 720 Schwartz, R. S. and R. L. Mueller. 2010. Branch length estimation and divergence  
721 dating: estimates of error in Bayesian and maximum likelihood frameworks. BMC  
722 Evol. Biol. 10:5.
- 723 Shimodaira, H. and M. Hasegawa. 2001. CONSEL: for assessing the confidence of  
724 phylogenetic tree selection. Bioinformatics 17: 1246-1247.
- 725 Smith, D. A. S., G. Lushai and J. A. Allen. 2005. A classification of *Danaus* butterflies  
726 (Lepidoptera: Nymphalidae) based upon data from morphology and DNA. Zool. J.  
727 Linn. Soc. 144:191-212.
- 728 Stamatakis, A. 2014. RAxML Version 8: A tool for Phylogenetic Analysis and Post-  
729 Analysis of Large Phylogenies. Bioinformatics 30:1312-1313.
- 730 Stern, D. L. 2013. The genetic causes of convergent evolution. Nat. Rev. Genet.  
731 14:751-764.
- 732 Tajima, F. 1993. Simple methods for testing the molecular evolutionary clock  
733 hypothesis. Genetics 135:599-607.
- 734 Tavaré, S. 1986. Some Probabilistic and Statistical Problems in the Analysis of DNA  
735 Sequences. Lectures Math. Life Sci. 17:57-86.
- 736 Wells, H., P. H. Wells and S. H. Rogers. 1993. Is multiple mating an adaptive feature  
737 of monarch butterfly winter aggregation? Pp. 61-68. S. B. Malcolm and M. P.  
738 Zalucki, eds. Biology and Conservation of the Monarch Butterfly. No. 38 Science  
739 Series, Nat. Hist. Mus. of Los Angeles Co. Los Angeles, CA. USA.
- 740 Woofit, M. 2009. Effective population size and the rate and pattern of nucleotide  
741 substitutions. Biol. Lett. 5:417-420.

- 742 Yang, Z. 2007. PAML 4: a program package for phylogenetic analysis by maximum  
743 likelihood. *Mol. Biol. Evol.* 24: 1586-1591.
- 744 Zerbino, D.R. and E. Birney. 2008. Velvet: algorithms for de novo short read  
745 assembly using de Bruijn graphs. *Genome Res.* 18:821-829.
- 746 Zhan, S., W. Zhang, K. Niitepõld, J. Hsu, J. F. Haeger, M. P. Zalucki, S. Altizer, J. C. de  
747 Roode, S. M. Reppert and M. R. Kronforst. 2014. The genetics of monarch butterfly  
748 migration and warning coloration. *Nature* 514:317-321.
- 749 Zhen, Y., M. L. Aardema, E. M. Medina, M. Schumer and P. Andolfatto. 2012. Parallel  
750 molecular evolution in an herbivore community. *Science* 337:1634-1637.

751 **Tables**

752 **Table 1.** Comparison of the three possible phylogenetic relationships among the  
 753 butterflies in this study for all mitochondrial (mtDNA) and genomic regions (gDNA).  
 754 [“ref. mapped” = reference-mapped nuclear gene dataset; “*de novo*” = *de novo*-  
 755 assembled nuclear gene dataset]. Significance between trees was determined using  
 756 the AU test. See Materials and Methods for more details.

| Dataset                                 | Tree Comparison<br>(see Fig. 2) | $ \Delta \ln L $ | p value from AU<br>test |
|-----------------------------------------|---------------------------------|------------------|-------------------------|
| mtDNA                                   | Tree A – Tree B                 | 1.5              | 0.270                   |
| mtDNA                                   | Tree A – Tree C                 | 0.2              | 0.391                   |
| mtDNA                                   | Tree B – Tree C                 | 1.6              | 0.202                   |
| gDNA (ref. mapped)                      | Tree A – Tree B                 | 267.4            | <0.001*                 |
| gDNA (ref. mapped)                      | Tree A – Tree C                 | 239.2            | <0.001*                 |
| gDNA (ref. mapped)                      | Tree B – Tree C                 | 30.3             | 0.024*                  |
| gDNA ( <i>de novo</i> )                 | Tree A – Tree B                 | 282.9            | <0.001*                 |
| gDNA ( <i>de novo</i> )                 | Tree A – Tree C                 | 297.6            | <0.001*                 |
| gDNA ( <i>de novo</i> )                 | Tree B – Tree C                 | 22.6             | 0.057                   |
| Na <sup>+</sup> ,K <sup>+</sup> -ATPase | Tree A – Tree B                 | 3.5              | 0.841                   |
| Na <sup>+</sup> ,K <sup>+</sup> -ATPase | Tree A – Tree C                 | 3.5              | 0.220                   |
| Na <sup>+</sup> ,K <sup>+</sup> -ATPase | Tree B – Tree C                 | 4.4              | 0.069                   |

757

758 \* indicates statistical significance at  $p \leq 0.05$ .

759 **Table 2.** Levels of 4-fold synonymous nucleotide diversity ( $\pi_{4f}$ ) across all mapped 4-  
760 fold synonymous sites, as well as  $\pi_{4f}$  for Na<sup>+</sup>,K<sup>+</sup>-ATPase.

| Species             | Number of mapped genes <sup>1</sup> | Total number of 4-fold synonymous sites <sup>2</sup> | Weighted 4-fold synonymous $\pi$ <sup>3</sup> (95% CIs) | 4-fold synonymous $\pi$ of Na <sup>+</sup> ,K <sup>+</sup> -ATPase |
|---------------------|-------------------------------------|------------------------------------------------------|---------------------------------------------------------|--------------------------------------------------------------------|
| <i>D. plexippus</i> | 4,185                               | 507,661                                              | 0.0214<br>(0.0208 - 0.0221)                             | 0.0271                                                             |
| <i>D. eresimus</i>  | 1,481                               | 94,920                                               | 0.0099<br>(0.0090 - 0.0108)                             | 0.0103                                                             |
| <i>D. gilippus</i>  | 1,139                               | 71,442                                               | 0.0207<br>(0.0184 - 0.0230)                             | 0.0156                                                             |
| <i>L. halia</i>     | 2,625                               | 195,577                                              | 0.0220<br>(0.0208 - 0.0232)                             | 0.0000                                                             |

761

762 <sup>1</sup>These are genes that contain at least one 4-fold synonymous site with read

763 coverage of 30 or greater.

764 <sup>2</sup>The total number of 4-fold synonymous sites with 30 or greater read coverage.

765 <sup>3</sup> Based on estimates from mapped genes (column 2), weighted by the number of 4-

766 fold synonymous sites in each gene.

767 **Figures**

768 **Figure 1.** A) The best supported phylogenetic relationship as determined using  
769 mtDNA sequence data. Numbers indicate branch lengths. This tree topology had  
770 65% bootstrap support. B) The best supported phylogenetic relationship produced  
771 from 471 reference-mapped nuclear gene sequences. Numbers indicate branch  
772 lengths. This tree topology had 100% bootstrap support. C) The best supported  
773 phylogenetic relationship as determined using data from 478 *de novo*-assembled  
774 nuclear gene sequences. Numbers indicate branch lengths. This tree topology had  
775 100% bootstrap support. D) Levels of phylogenetic concordance/discordance  
776 between the best-supported species tree and individual gene trees. The red text and  
777 diagonal line indicates the level of discordance (with credibility intervals) that  
778 supports a closer relationship between *D. plexippus* and *D. gilippus* (with  $\alpha = 1.0$ ).  
779 The blue text and diagonal line indicated the level of discordance (with credibility  
780 intervals) that supports a closer relationship between *D. gilippus* and *D. eresimus*  
781 (with  $\alpha = 1.0$ ). **NOTE: Branch lengths in these trees (A-D) are not drawn to the**  
782 **same scale *between* trees.**

783

784 **Figure 2.** The percentages of ABBA/BABA informative sites that match the best-  
785 supported species tree (Tree A) and the two alternative trees for the three North  
786 American *Danaus* species in this study for either all 4-fold/0-fold sites (all), just 4-  
787 fold synonymous sites (syn.) or just 0-fold replacement sites (rep.). ('gili.' = *D.*  
788 *gilippus*, 'eres.' = *D. eresimus*, 'plex' = *D. plexippus*, 'hali' = *L. halia*).

789 **Figure 1.**

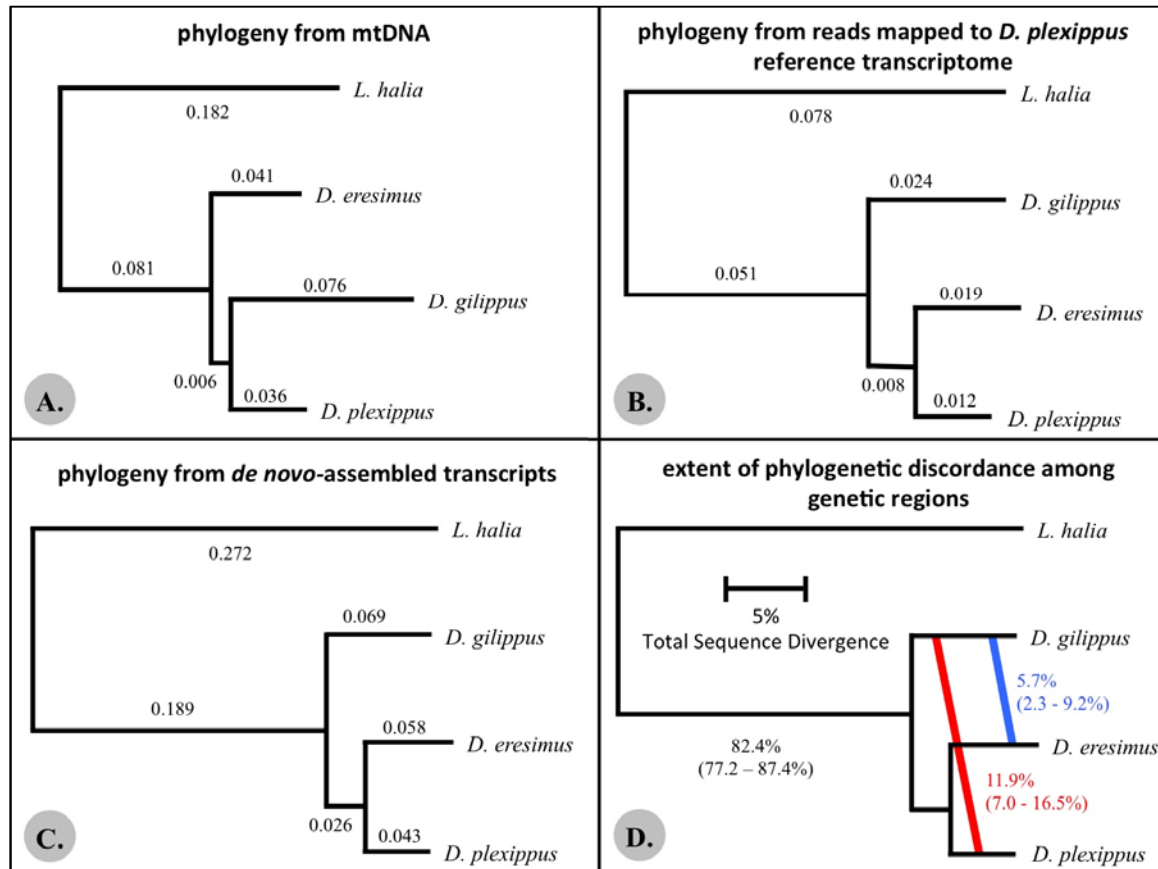

790

791

792 **Figure 2.**

| Data type        | Total informative sites | Tree A<br>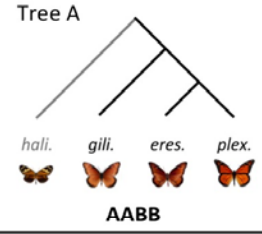<br>AABB | Tree B<br><br>ABBA | Tree C<br><br>ABAB (BABA) |
|------------------|-------------------------|-----------------------------------------------------------------------------------------------------|------------------------------------------------------------------------------------------------------|--------------------------------------------------------------------------------------------------------------|
| ABBA/BABA (all)  | 5735                    | 2818 (41.7%)                                                                                        | 1287 (22.4%)                                                                                         | 630 (28.4%)                                                                                                  |
| ABBA/BABA (syn.) | 4869                    | 2389 (49.1%)                                                                                        | 1074 (22.1%)                                                                                         | 1406 (28.9%)                                                                                                 |
| ABBA/BABA (rep.) | 866                     | 2389 (49.1%)                                                                                        | 213 (24.6%)                                                                                          | 224 (25.9%)                                                                                                  |

793  
794

795 **Supplementary Information**

796 **Table S1.** Summary statistics for the raw data used in this study, as well as the *de*

797 *nov*o assembly of each species' transcriptome.

| <b>Species</b>      | <b>Raw reads</b> | <b>Single-end (SE) or paired-end data (PE)?</b> | <b>Total nucleotides in <i>de novo</i> assembly</b> | <b>Number of transcripts in <i>de novo</i> assembly</b> | <b>N50 of <i>de novo</i> assembly</b> |
|---------------------|------------------|-------------------------------------------------|-----------------------------------------------------|---------------------------------------------------------|---------------------------------------|
| <i>D. plexippus</i> | 28,266,296       | SE                                              | 16,930,874                                          | 14,429                                                  | 1,919                                 |
| <i>D. eresimus</i>  | 5,878,381        | PE                                              | 8,461,965                                           | 11,750                                                  | 943                                   |
| <i>D. gilippus</i>  | 1,738,243        | PE                                              | 2,016,798                                           | 3,030                                                   | 981                                   |
| <i>L. halia</i>     | 16,067,453       | SE                                              | 10,810,257                                          | 18,251                                                  | 806                                   |

798



799 **Table S2.** The total number of Illumina reads for each species after quality  
 800 trimming, plus the number or trimmed reads that mapped to either the *D. plexippus*  
 801 CDS or a species-specific, *de novo* assembled transcriptome.

| Species             | Total trimmed reads | Reads mapped to <i>D. plexippus</i> reference CDS |            | Reads mapped to <i>de novo</i> assembled transcriptome |            |
|---------------------|---------------------|---------------------------------------------------|------------|--------------------------------------------------------|------------|
|                     |                     | mapped                                            |            | mapped                                                 |            |
| <i>D. plexippus</i> | 27,068,642          | mapped                                            | 19,132,116 | mapped                                                 | 25,598,815 |
|                     |                     | percent                                           | 70.7%      | percent                                                | 94.6%      |
| <i>D. eresimus</i>  | 5,354,186 (pairs)   | mapped                                            | 2,021,741  | mapped                                                 | 4,324,576  |
|                     |                     | percent                                           | 37.9%      | percent                                                | 80.8%      |
| <i>D. gilippus</i>  | 1,538,115 (pairs)   | mapped                                            | 1,268,745  | mapped                                                 | 1,523,195  |
|                     |                     | percent                                           | 82.5%      | percent                                                | 99.1%      |
| <i>L. halia</i>     | 14,530,186          | mapped                                            | 11,649,577 | mapped                                                 | 14,075,972 |
|                     |                     | percent                                           | 80.2%      | percent                                                | 96.9%      |

802

803 **Table S3.** Percentage of gene trees that support each of the three alternative tree  
804 topologies possible among the *Danaus* species in this study using an  $\alpha$  prior of either  
805 0.1, 1.0 or 10. Concordance factors (CF) are presented with creditability intervals (CI)  
806 in parentheses.

| Species Relationships | CF with $\alpha = 0.1$ (CI) | CF with $\alpha = 1.0$ (CI) | CF with $\alpha = 10.0$ (CI) |
|-----------------------|-----------------------------|-----------------------------|------------------------------|
| Tree A (Fig. 2)       | 0.824 (0.772 - 0.874)       | 0.822 (0.770 - 0.872)       | 0.804 (0.753 - 0.851)        |
| Tree B (Fig. 2)       | 0.057 (0.023 - 0.092)       | 0.058 (0.025 - 0.094)       | 0.069 (0.038 - 0.103)        |
| Tree C (Fig. 2)       | 0.119 (0.070 - 0.165)       | 0.120 (0.075 - 0.165)       | 0.127 (0.086 - 0.172)        |

807

## 808 **Supplementary Figures**

809 **Figure S1.** Historical phylogeny (see Ackery and Vane-Wright 1984; Lushai et al.  
810 2003; Smith et al. 2005; Brower et al. 2010) and amino acid sequences of the H1–H2  
811 extracellular domain of the Na<sup>+</sup>,K<sup>+</sup>-ATPase gene in the *Danaus* species examined in  
812 this study, plus a second milkweed butterfly outgroup *Tirumala petiverana* (adapted  
813 from Aardema et al. 2012, Zhen et al. 2012). The presence of a Valine at position 111  
814 (blue letters) in the three *Danaus* butterflies likely facilitates their ability to feed on  
815 milkweed and possibly sequester cardenolides. The N122H mutation (red letters)  
816 seen in *D. plexippus* and *D. eresimus* may also contribute to cardenolide feeding and  
817 sequestration ability (Zhen et al. 2012; Petschenka et al. 2013).

818

819 **Figure S2.** A.) The best supported phylogenetic relationship as determined using  
820 data from 478 *de novo*-assembled nuclear gene regions. Numbers indicate branch  
821 lengths (this is the same tree as shown in Fig. 1C). B.) The best supported  
822 phylogenetic relationship produced with data from the Na<sup>+</sup>,K<sup>+</sup>-ATPase gene (in  
823 RAxML with a gamma distribution of rate heterogeneity [i.e. GTR +  $\Gamma$  model]). This  
824 relationship has 58% bootstrap support based on 100 bootstrap replicates. The  
825 branches of these two trees are drawn to the same scale.

826

827 **Figure S3.** Graphical representation of potential scenarios to account for the  
828 presence of the N122H mutation in the H1-H2 extracellular domain of Na<sup>+</sup>,K<sup>+</sup>-  
829 ATPase in both *D. plexippus* and *D. eresimus*. Not all possible scenarios are displayed  
830 in this figure. A) The N122H mutation arose in the common ancestor of *D. plexippus*

831 and *D. eresimus* and either fixed in this common ancestor (right), or else fixed  
832 independently in each lineage (left). B) The N122H mutation arose in the common  
833 ancestor of all three species, but was lost in *D. gilippus*. C) The mutation arose or  
834 was present in either *D. plexippus* or *D. eresimus*, and then introgressed into the  
835 second species. The dashed boxes are present to indicate that we cannot infer the  
836 direction of this potential introgression, although our data suggests that if  
837 introgression is responsible for this mutation in both species, then it is more  
838 probably that it introgressed from *D. plexippus* into *D. eresimus*.

839

840 **Figure S4.** Comparison of log dS between *D. plexippus* and *D. eresimus* (x axis), and  
841 log dS between *D. gilippus* and *L. halia* (y axis). The left figure shows dS estimates  
842 based on the method of Nei and Gojobori (1986), as determined in PAML (v. 4.8;  
843 Yang 2007). The right figure shows maximum-likelihood estimates of dS, also  
844 determined in PAML. The single red dot in each figure indicates the location of the  
845 dS estimates for the Na<sup>+</sup>,K<sup>+</sup>-ATPase gene. Solid lines indicate the regression line for  
846 each dataset, and the dashed lines are the 95% confidence intervals for this line.

847 **Figure S1.**

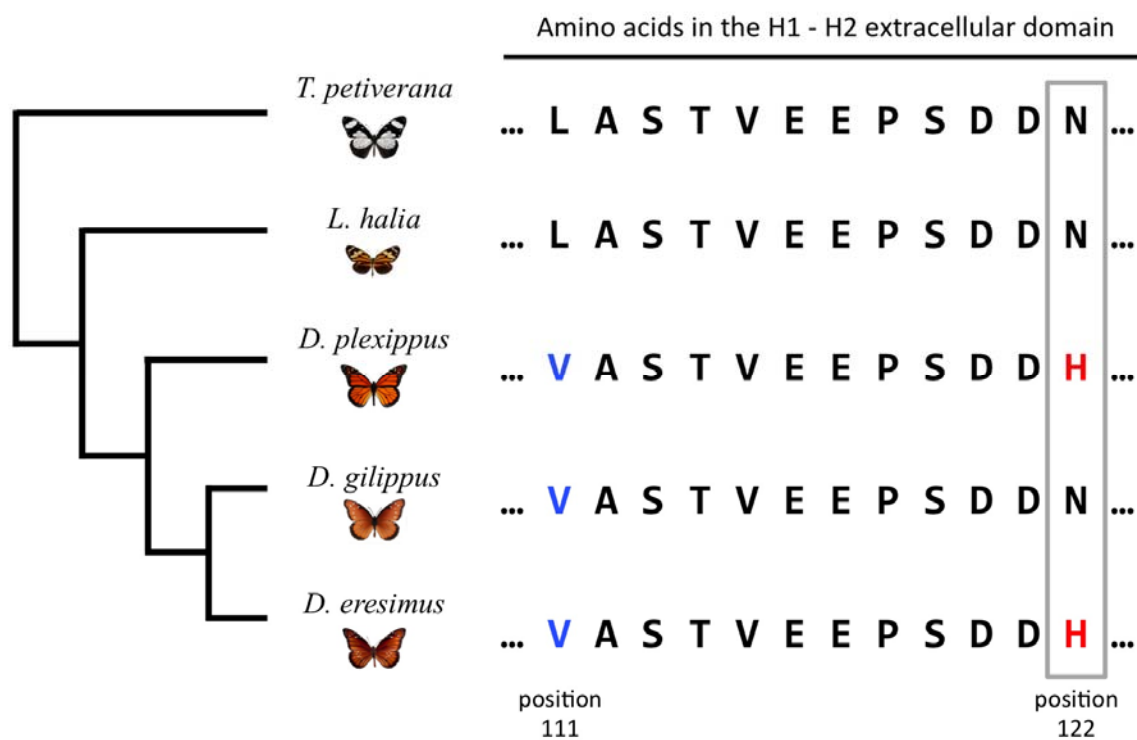

848

849 **Figure S2.**

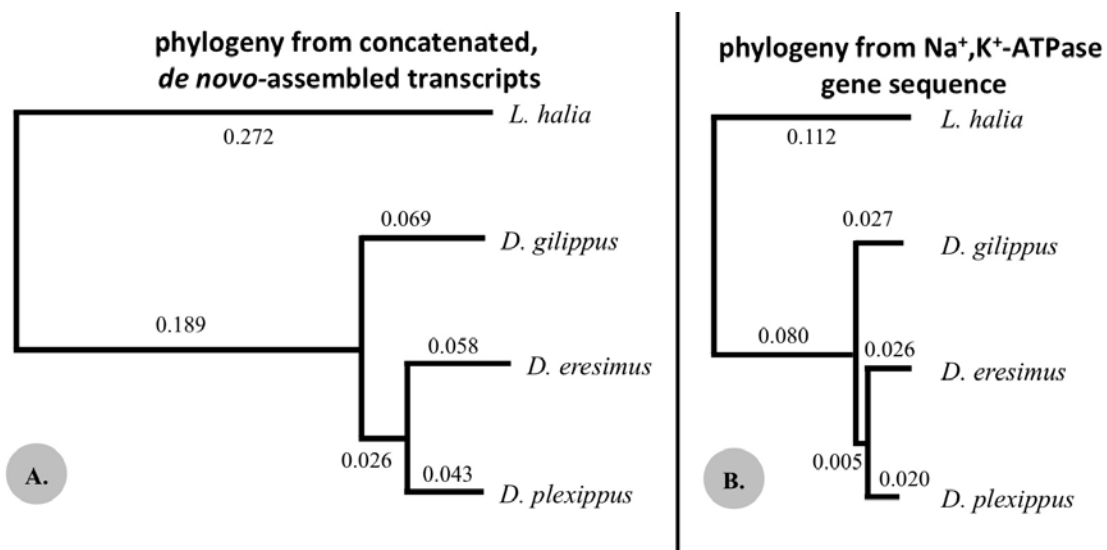

850  
851

852 **Figure S3.**

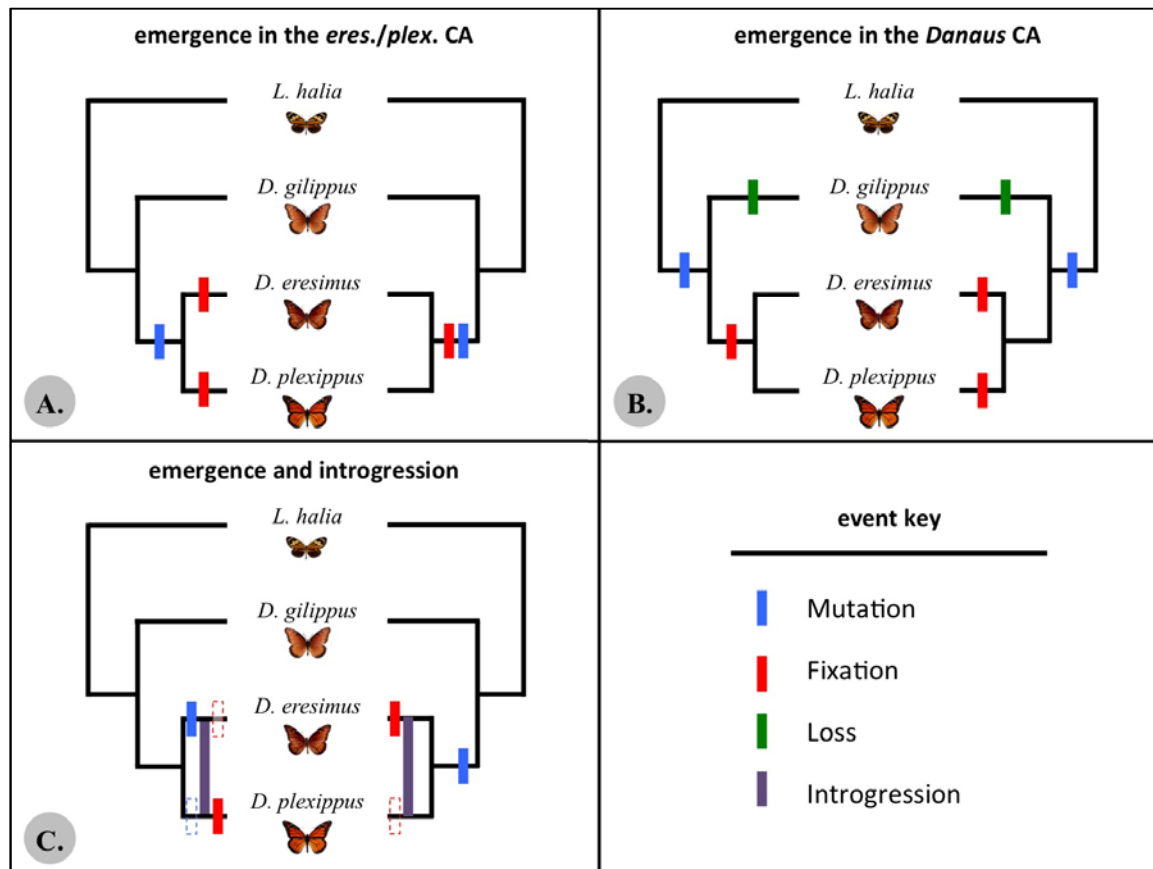

853

854

855 **Figure S4.**

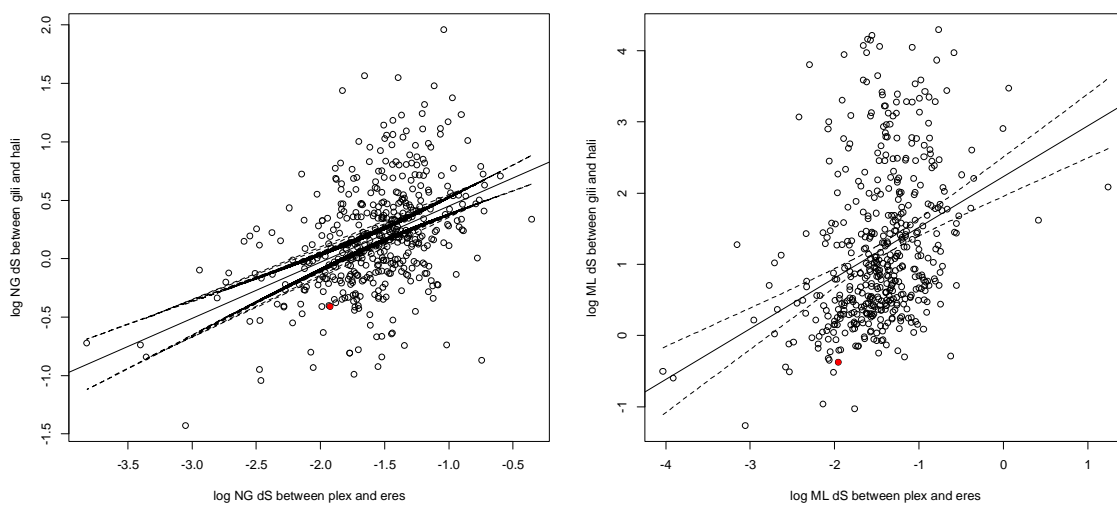

856

857
